# Supplementary material
Source: Research Square preprint supplement (doi:10.21203/rs.3.rs-9123220/v1)

**SUPPLEMENTARY MATERIALS**

Supplementary figure 1 – Proportion of dengue serotypes identified by each year from 2014 to 2024 in Brazil.


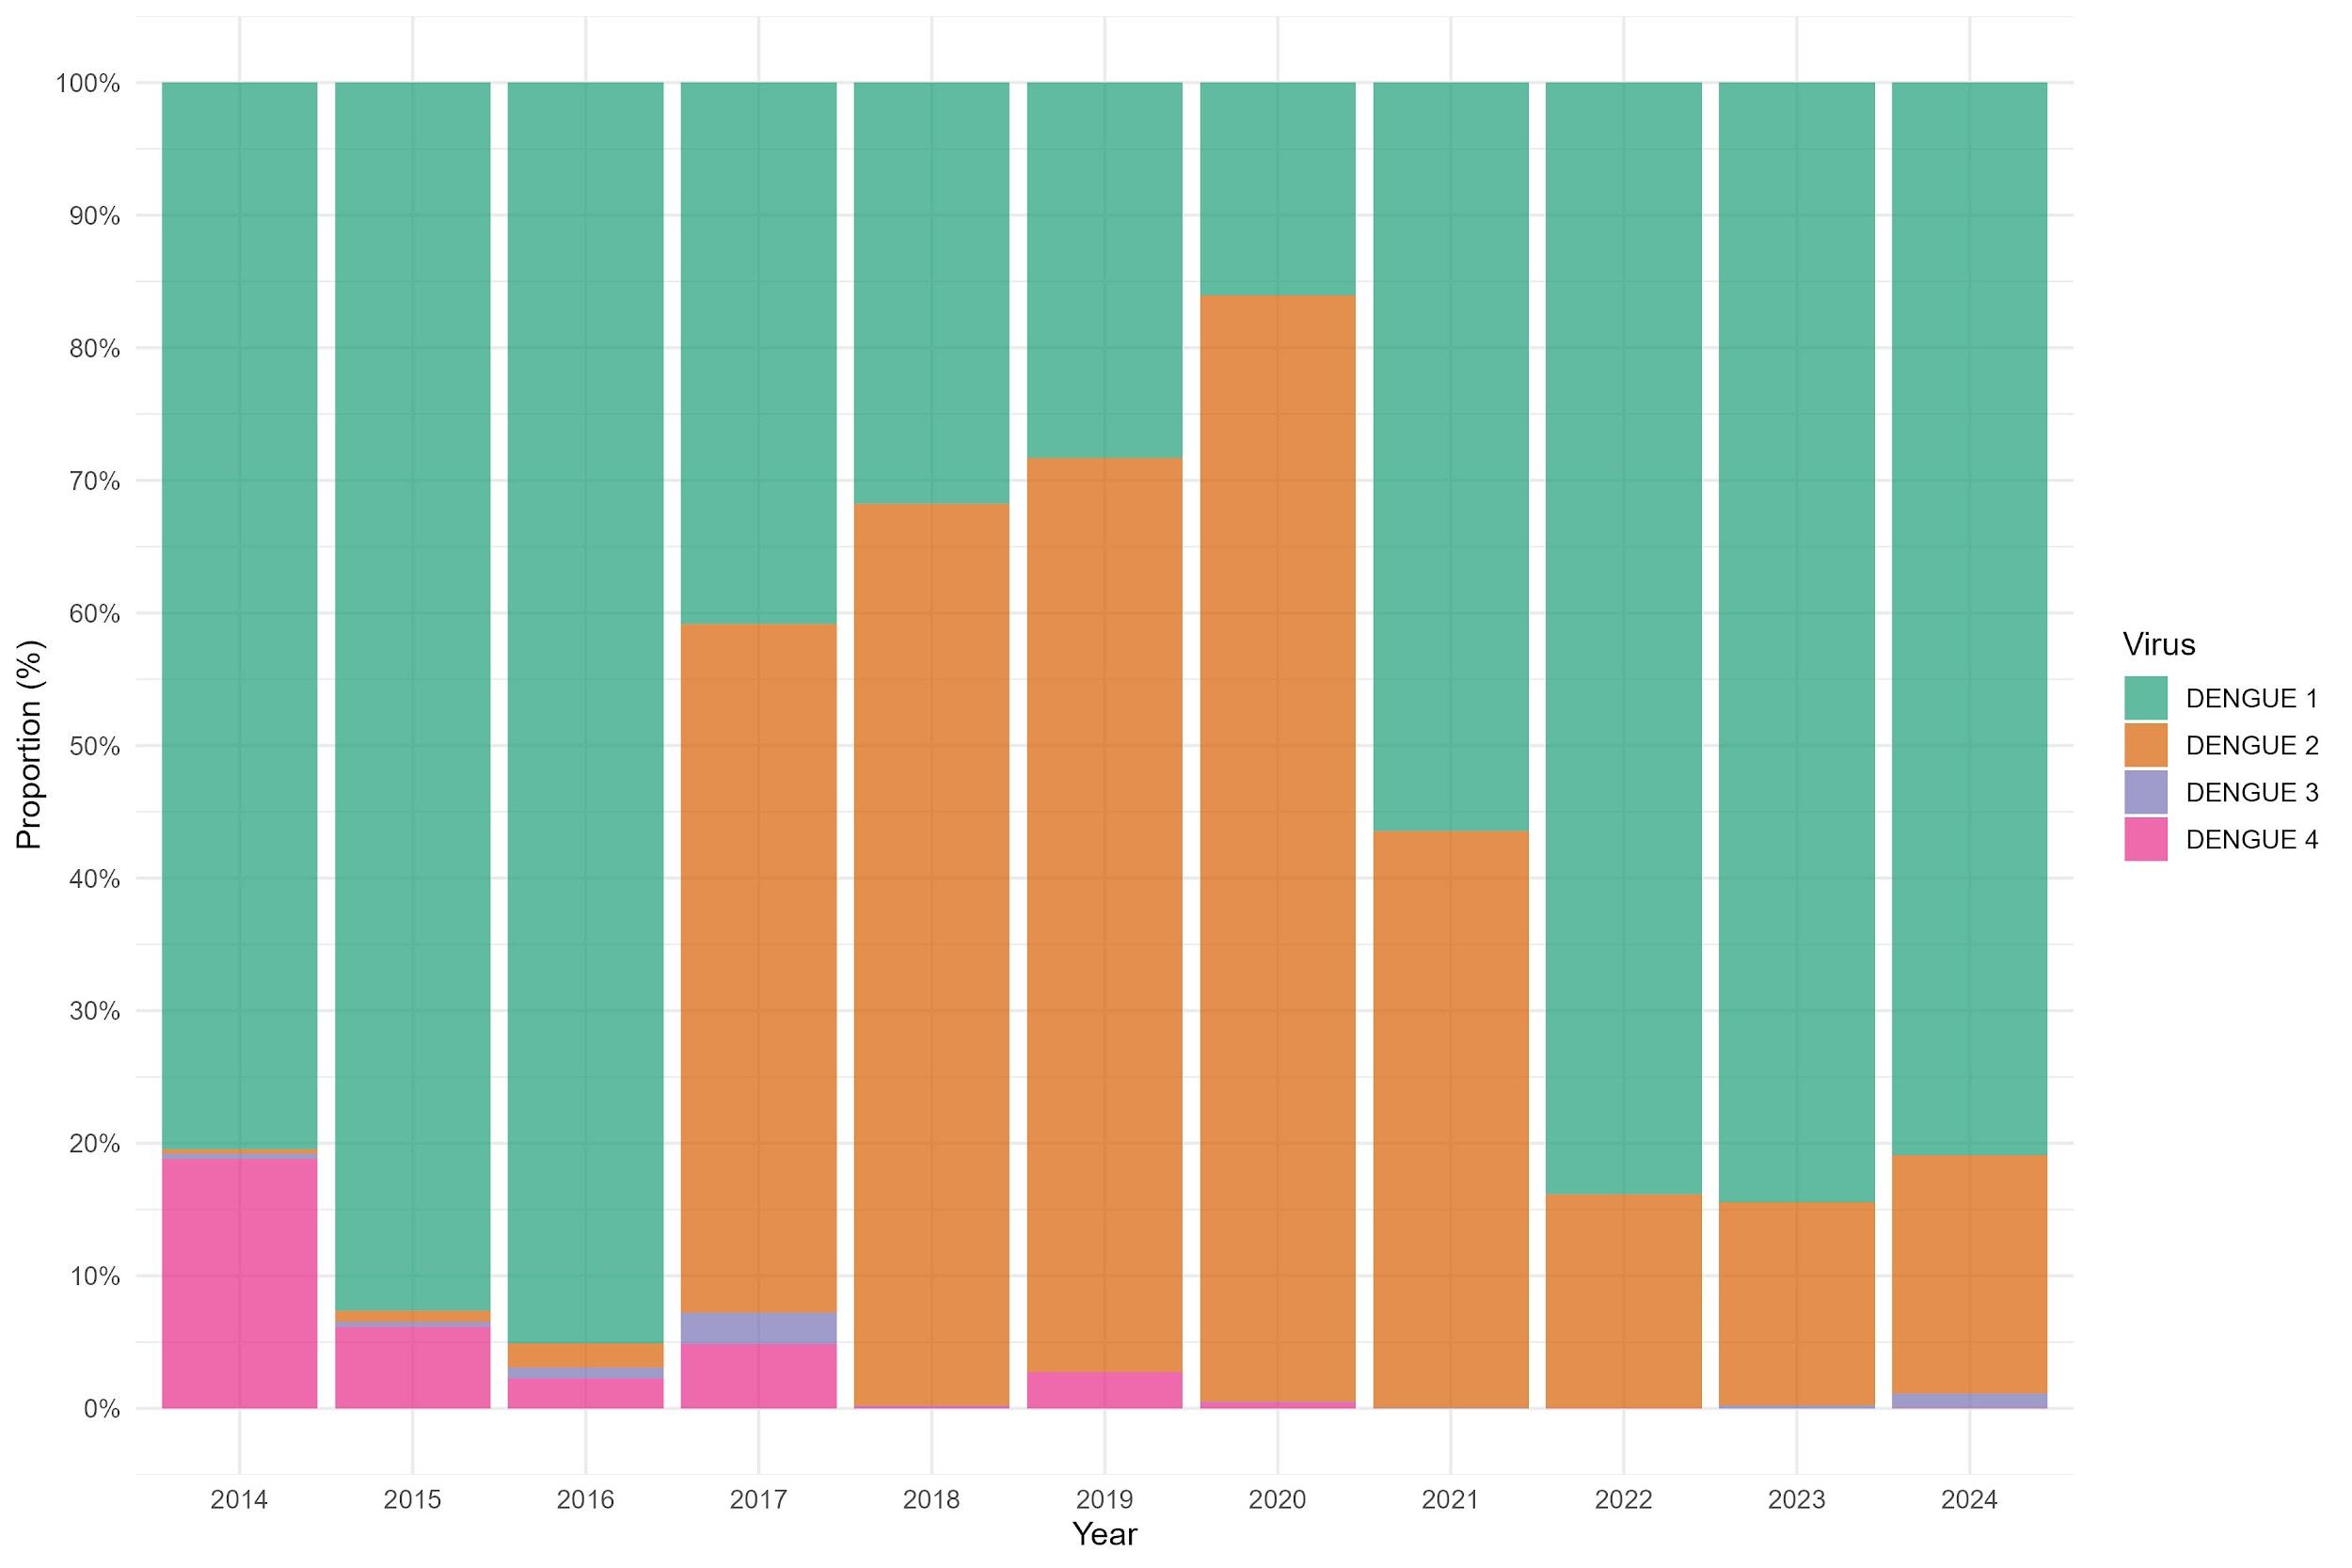


Supplementary figure 2 – Proportion of dengue serotypes identified by each year from Brazilian federative unit from 2014 to 2024.


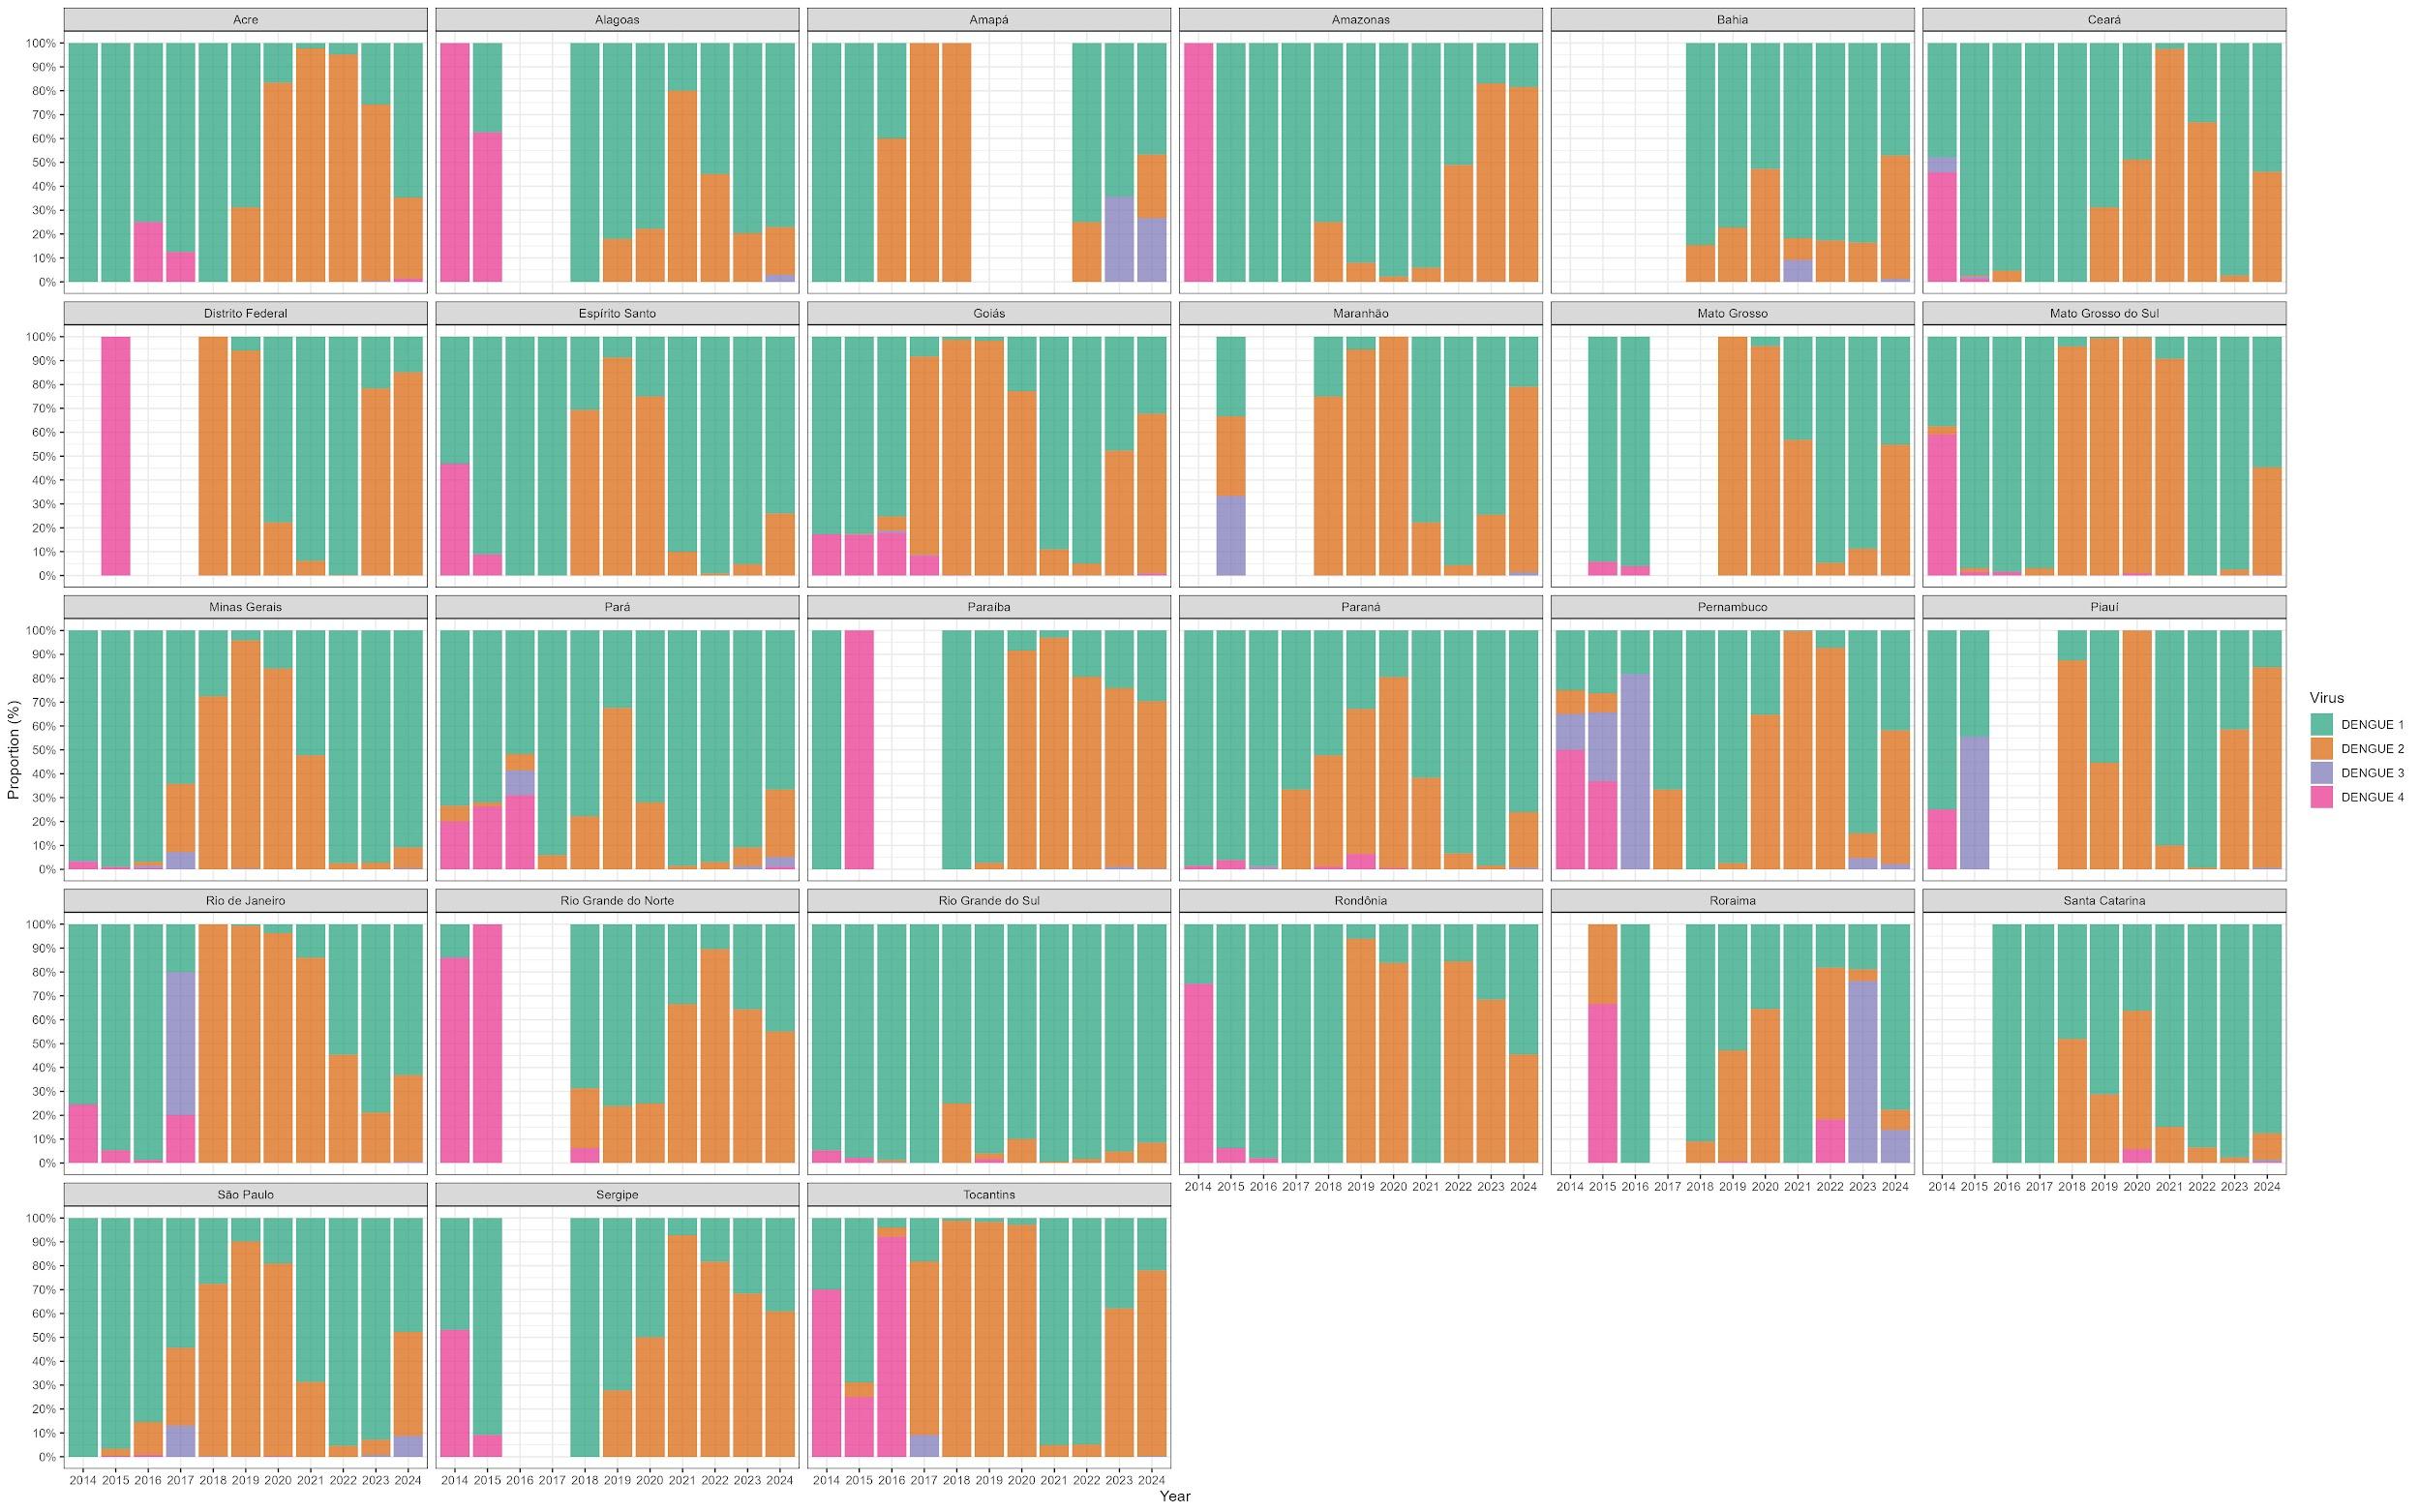

Supplement: Supplementary file 2 [file d55884334201708fc089c5f4.docx]
